# Supplementary material
Source: PubMed Central journal article supplement (PMC4839970)

sFig 1

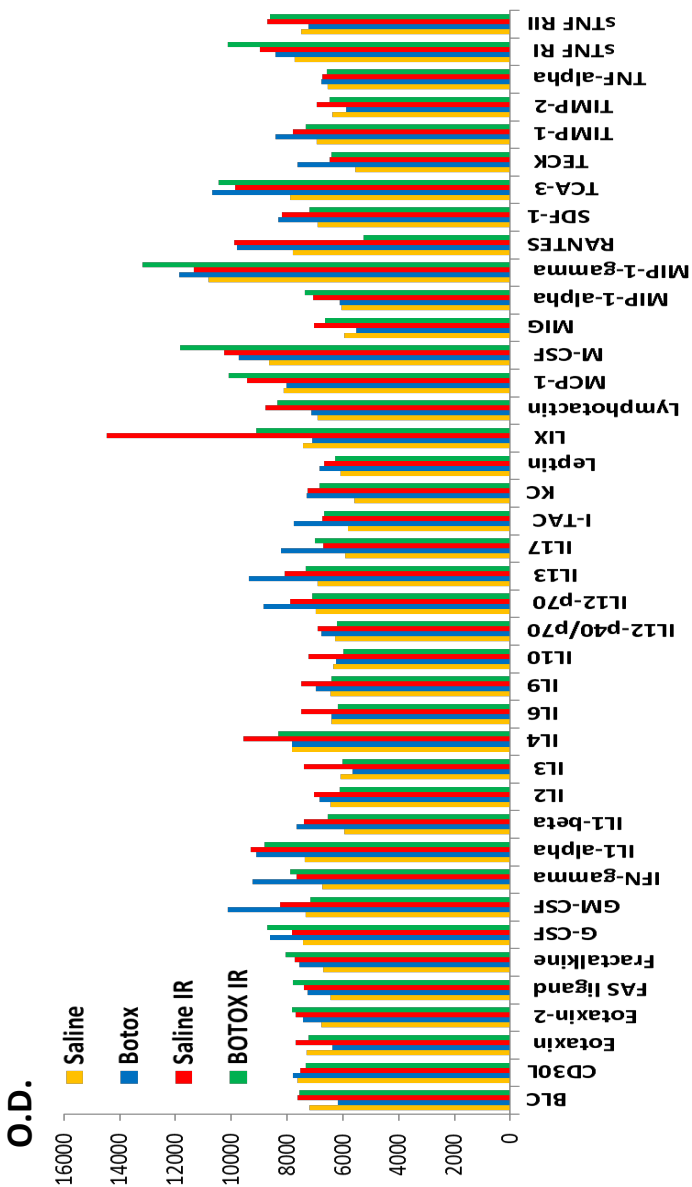

Supplement: NIHMS769320-supplement-Supplemental.pdf [file NIHMS769320-supplement-Supplemental.pdf]
